# Supplementary material for: Effects of adjunct testosterone on cardiac morphology and function in advanced cancers: an ancillary analysis of a randomized controlled trial
Source: Springer Nature journal article supplement (doi:10.1186/s12885-019-6006-5), 2019-08-07
Supplement: MOESM1 [file 17047028]

Additional File 1. Absolute change in cardiac outcomes.

|               |      | PLACEBO |        | TESTOSTERONE |        | Group | Time  | Group*Time |
|---------------|------|---------|--------|--------------|--------|-------|-------|------------|
|               |      | Mean    | SD     | Mean         | SD     |       |       |            |
| <b>SV</b>     | PRE  | 72      | ± 7.0  | 63           | ± 4.8  |       |       |            |
|               | POST | 70      | ± 8.7  | 75           | ± 8.8  | 0.487 | 0.097 | 0.024      |
| <b>EF</b>     | PRE  | 0.61    | ± 0.06 | 0.58         | ± 0.06 |       |       |            |
|               | POST | 0.59    | ± 0.07 | 0.65         | ± 0.02 | 0.475 | 0.304 | 0.07       |
| <b>Ea</b>     | PRE  | 1.46    | ± 0.18 | 1.63         | ± 0.23 |       |       |            |
|               | POST | 1.60    | ± 0.24 | 1.28         | ± 0.16 | 0.323 | 0.181 | 0.004      |
| <b>Ea/Ees</b> | PRE  | 0.66    | ± 0.17 | 0.73         | ± 0.18 |       |       |            |
|               | POST | 0.70    | ± 0.20 | 0.55         | ± 0.06 | 0.493 | 0.3   | 0.078      |
| <b>SVR</b>    | PRE  | 1236    | ± 179  | 1365         | ± 234  |       |       |            |
|               | POST | 1282    | ± 240  | 1006         | ± 154  | 0.342 | 0.047 | 0.012      |
| <b>E/e'</b>   | PRE  | 5.97    | ± 1.52 | 7.66         | ± 2.01 |       |       |            |
|               | POST | 5.74    | ± 1.59 | 5.74         | ± 1.64 | 0.173 | 0.087 | 0.175      |

SV, stroke volume; EF, left ventricular ejection fraction; Ea, end arterial elastance; Ea/Ees, ventricular vascular coupling; SVR, systemic vascular resistance
